# Supplementary material for: Role of heparanase 2 (Hpa2) in gastric cancer
Source: PubMed Central journal article supplement — Neoplasia. 2021 Jul 31;23(9):966–78. doi: 10.1016/j.neo.2021.07.010 (PMC8349917; doi:10.1016/j.neo.2021.07.010), 2021-07-31
Supplement: mmc1.pdf [file mmc1.pdf]

### Supplementary Figure legends

**Suppl. Figure 1. A.** Stably transfected gastric carcinoma cells. The indicated cell line was transfected with control empty plasmid (Vo) or Hpa2 gene construct. Following selection, cells were expanded and pooled; Total RNA was extracted and subjected to qPCR applying primers specific for Hpa2. Shown are Hpa2 expression levels in transfected cells vs control (Vo) cells, set arbitrarily to a value of 1. **B.** Decreased tumor burden by Hpa2 cells. Control (Vo) and Hpa2 overexpressing MGC-803 cells were implanted intra-peritoneal into NOD/SCID mice (n=7). After 14 days mice were sacrificed and ascites fluids were collected. Shown is the average volume (ml) of ascites fluids collected from mice implanted with control (Vo) and Hpa2 cells. Tumors were collected from the peritoneum, fixed in formalin, and processed for histological examination (C). Shown are images of H&E staining of control (Vo, left) and Hpa2 tumor sections (right) at low (upper panels) and high (lower panels) magnification.

**Suppl. Fig. 2.** Hpa2 expression is induced by MG132. Mouse embryonic fibroblasts (MEF) (A) and mouse Lewis lung carcinoma (B) cells were treated with MG132 (20  $\mu$ M) for the time indicated (A) or the indicated concentration of MG132 for 16 hours (B). Total RNA was then extracted and subjected to qPCR applying primers specific for Hpa2 (upper panels), MIP2 (middle panels) and TNF- $\alpha$  (lower panels).

**Suppl. Figure 3. A.** Induction of heat shock protein (HSP) expression by MG132 and Bortezomib. BGC-823 cells were treated with vehicle alone (DMSO, con), MG132 (20  $\mu$ M), or Bortezomib (0.5 mM) for 16 hours. Total RNA was then extracted and subjected to qPCR applying primers specific for HSP40 (upper panel), HSP105 (second panel), HSP27 (third panel), or HSP70 (lower panel). **B.** MKN-45 cells were similarly treated with MG132 in the absence (MG) or presence of KRIBB 11 (5  $\mu$ M; MG+KRBB) or KNK-437 (100  $\mu$ M; MG+KNK) for 16 hours. Total RNA was then extracted and subjected to qPCR applying primers specific for HSP40 (upper panel), HSP105 (second panel), HSPA1A (third panel) and HSPA1B (lower panel). Note that, unlike HSP40 and HSP105, KRIBB 11 and KNK-437 do not attenuate the induction of HSPA1A and HSPA1B by MG132. \*\*: statistically significant decrease of Hpa2 expression in MG+KRBB/MG+KNK vs MG alone.

**Suppl. Figure 4.** Metformin enhances AMPK phosphorylation, attenuates the proliferation of gastric carcinoma cells, and induces Hpa2 expression. **A.** Inhibitors. MKN-45 cells were

treated with vehicle (DMSO; Con) or MG132 without (Control) or with (+MG) the indicated concentrations of sp600125 (JNK inhibitor), KRIBB 11 (KRBB; HSF1 inhibitor), and dorsomorphin (Dor; AMPK inhibitor). Total RNA was extracted after 24 hours and subjected to qPCR applying primers specific for Hpa2. Note that Hpa2 induction by MG132 is only modestly inhibited by sp600125. **B.** MKN-45 (left) and SGC-7901 (right) cells were treated with metformin (0.5 mM) for the time indicated. Protein extracts were then prepared and subjected to immunoblotting applying anti-phospho-AMPK (upper panels), AMPK (second panels), phospho-ACC (third panel) and ACC (lower panel). MKN-45 cells were treated with the indicated concentration of metformin and relative cell numbers were evaluated as described under 'Materials and methods' (C). **D.** MKN-45 cells were treated with phenformin (analog of metformin that reaches higher concentration inside cells; 0.5 mM) for the time indicated. Total RNA was then extracted and subjected to qPCR applying primers specific for Hpa2. **E.** Cellular invasion by control (Vo), Vo+metformin (0.5 mM), and Hpa2 overexpressing SGC-7901 cells were evaluated. Shown are representative images of invading cells taken 24 hours after cell seeding. Quantifications of the number of invading cells is shown graphically in the right panel. **F.** Tumor xenografts produced by control (Vo) and Hpa2 overexpressing FaDu pharyngeal carcinoma cells were subjected to immunostaining applying anti-phospho-AMPK antibody. Shown are representative photomicrographs at low (x25; upper panels) and high (x100; lower panels) magnifications.

**A**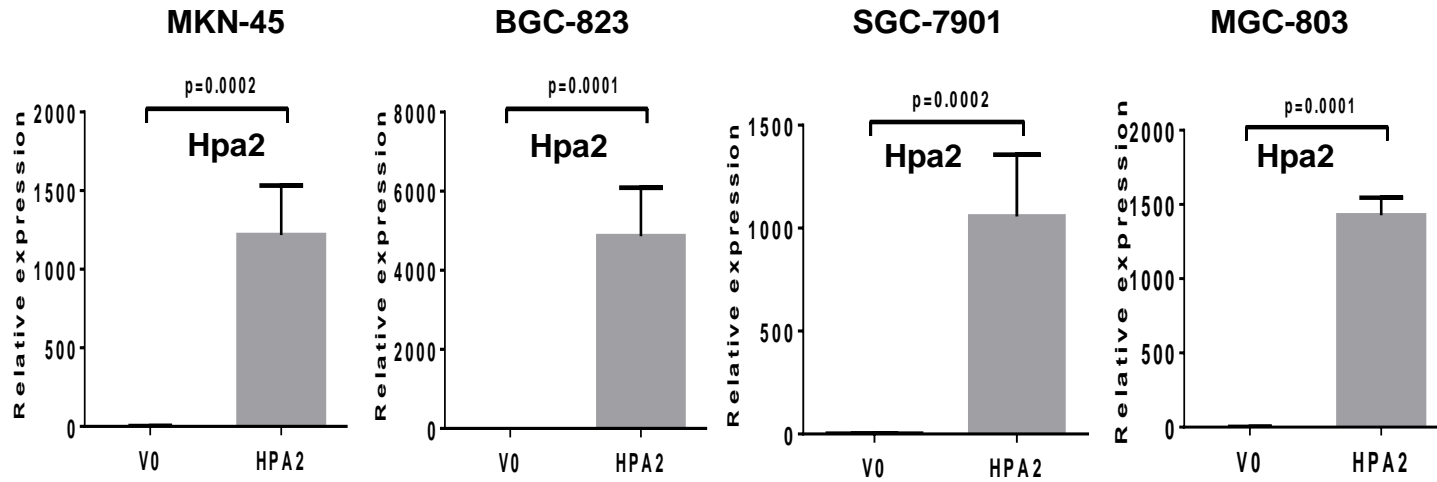**B**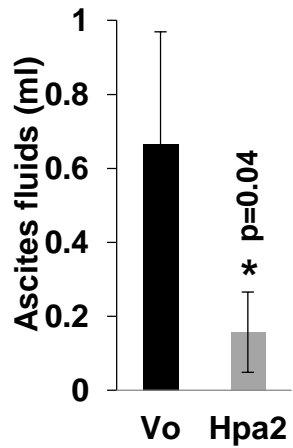**C**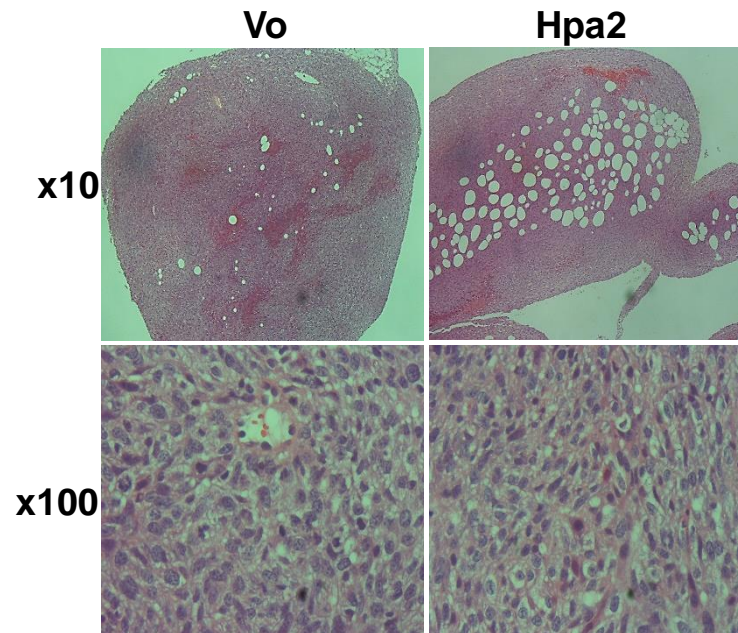

**A**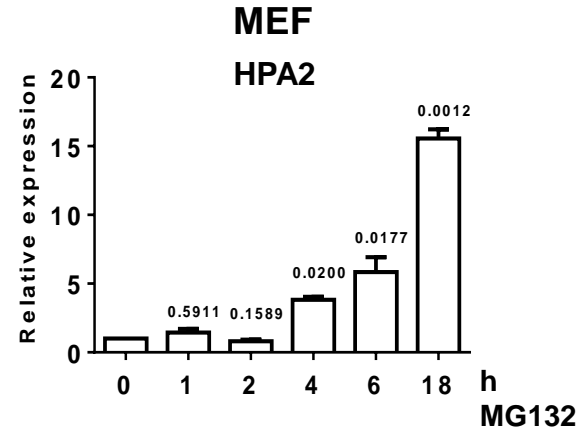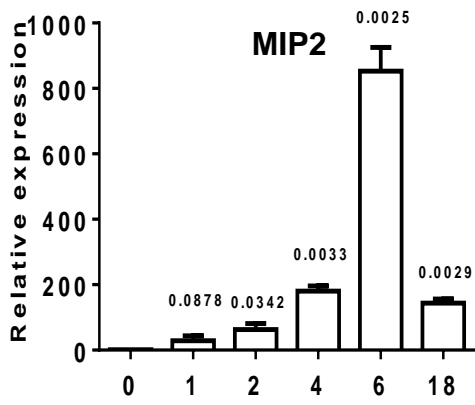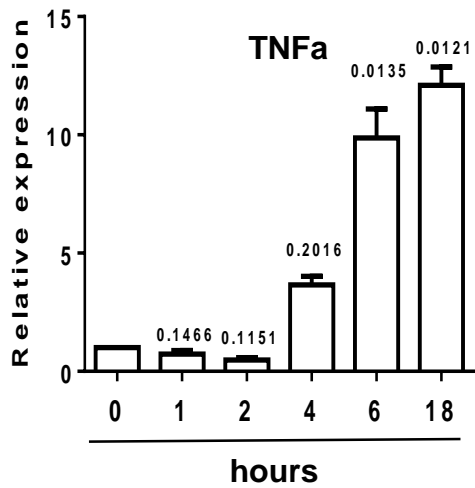**B**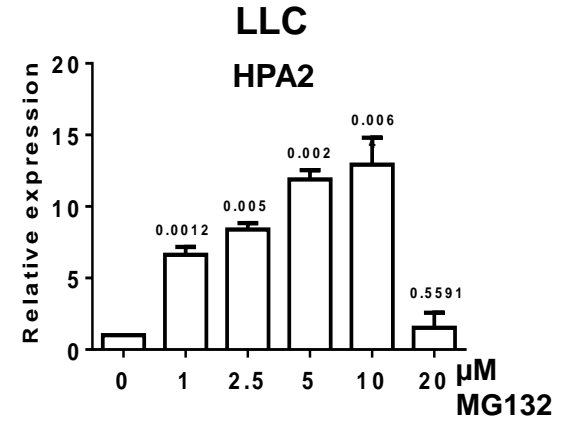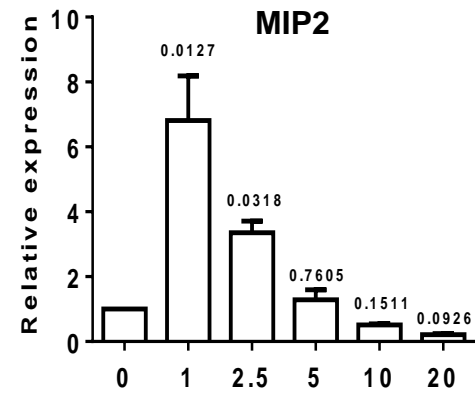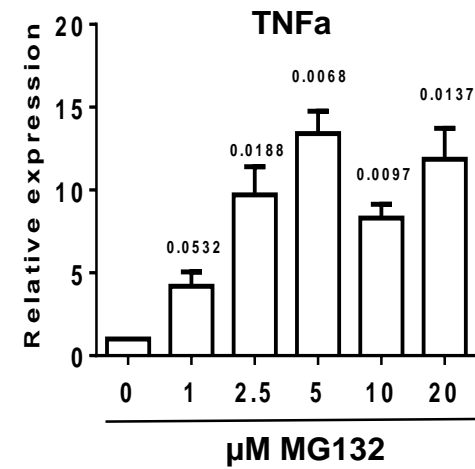

Suppl. Fig. 2

**A**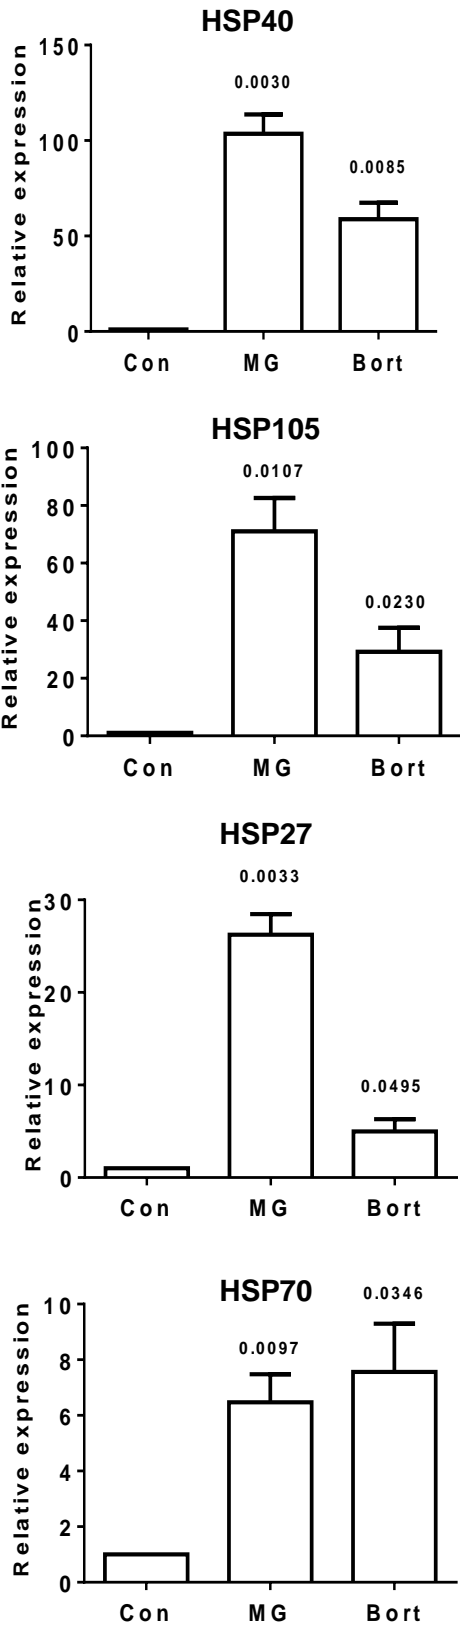**B**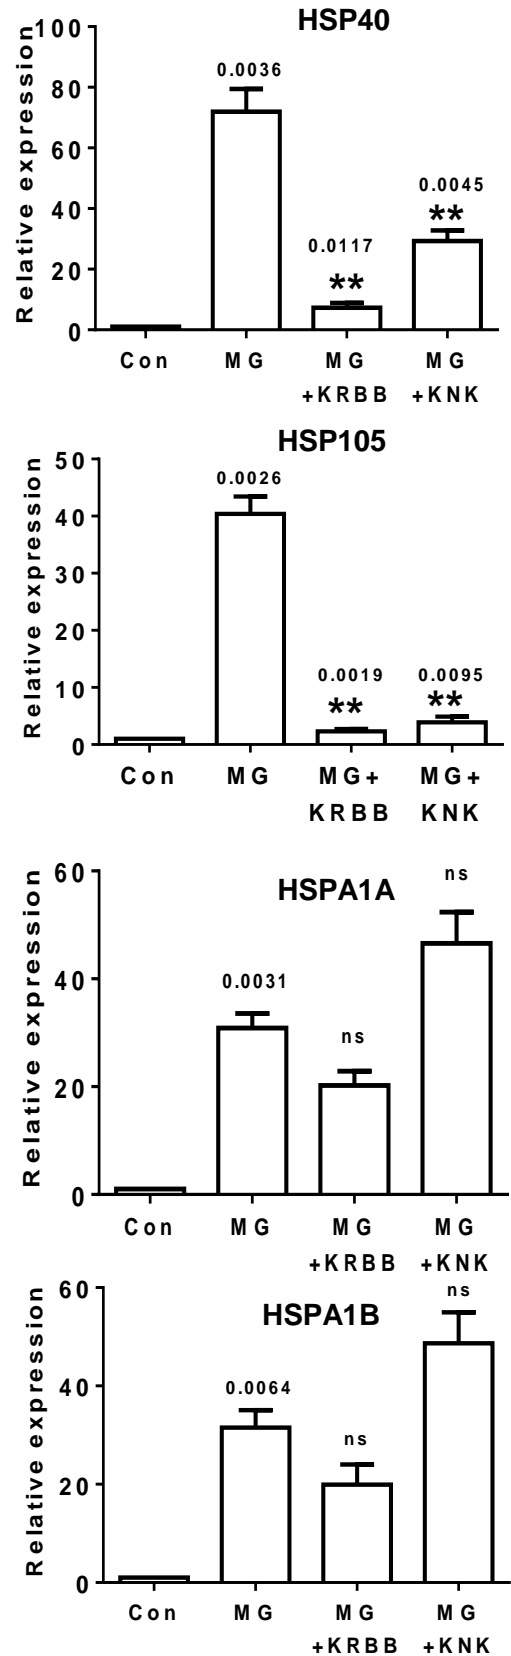

Suppl. Fig. 3

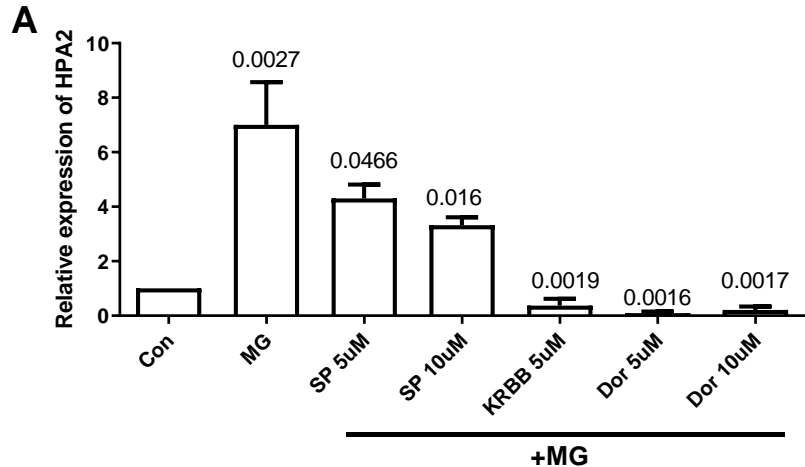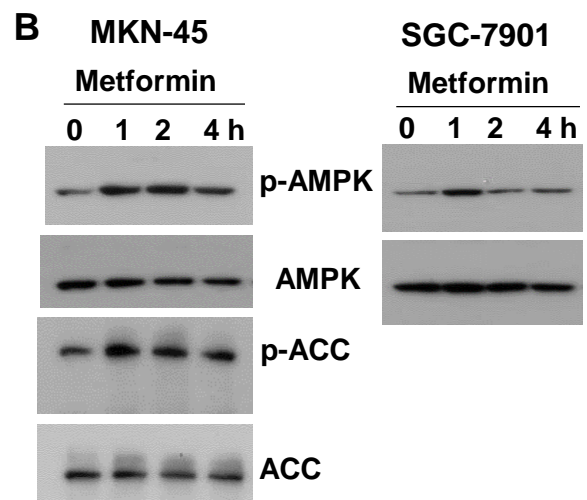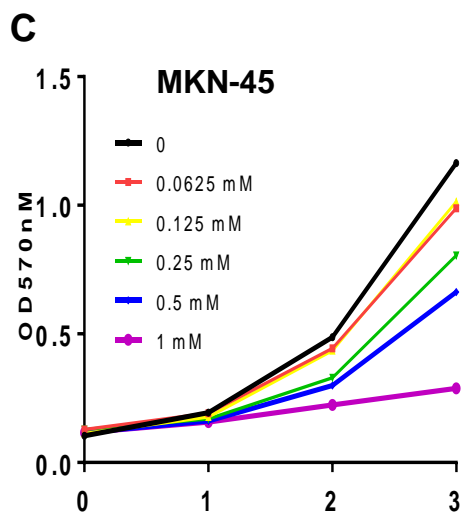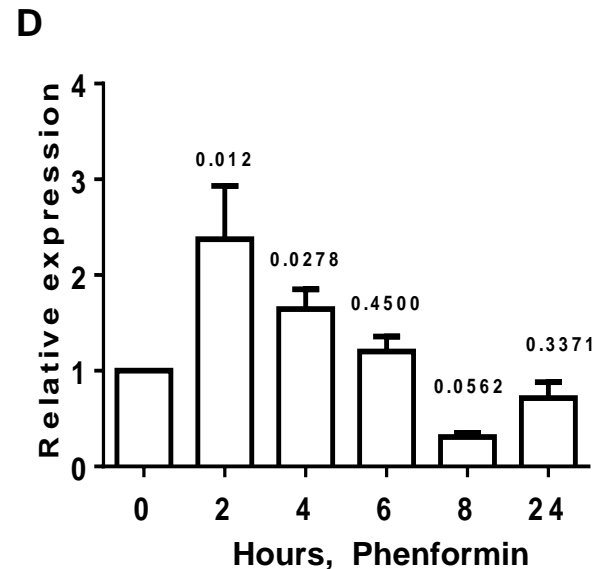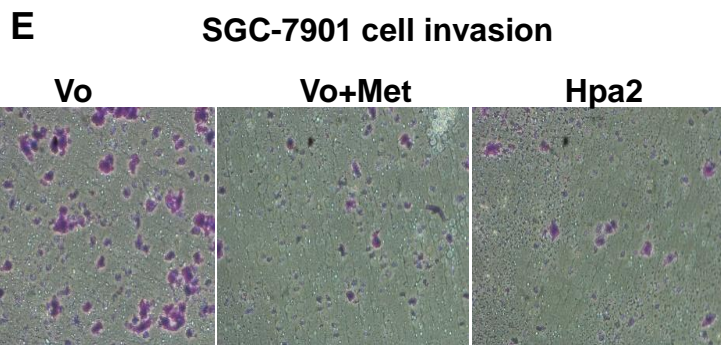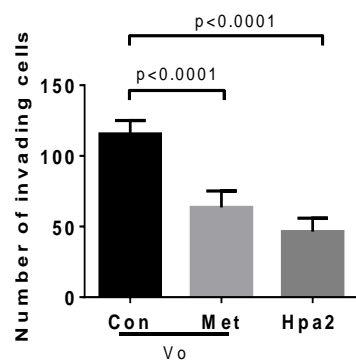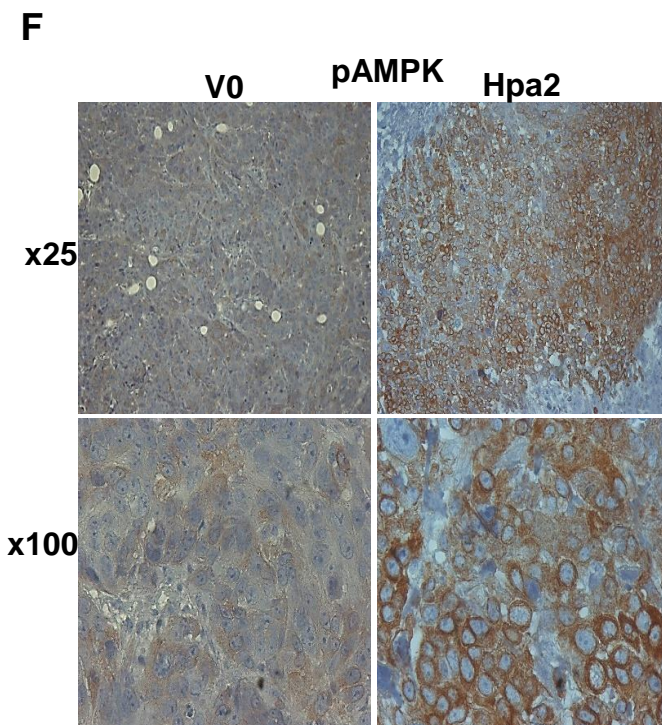

**Suppl. Table 1.** Sequence of primers sets used in qPCR analyses.

| Name            | Forward (5'-3')        | Reverse                  |
|-----------------|------------------------|--------------------------|
| <b>Mouse</b>    |                        |                          |
| Hpa2            | CCTGGAACAGTTCTAGTGCCC  | ATGCTCCGATAGTTATTTGGCTC  |
| Actin           | ATGCTCCCCGGGCTGTAT     | CATAGGAGTCCTTCTGACCCATTC |
| MIP2            | CCAACCACCAGGCTACAGG    | GCGTCACACTCAAGCTCTG      |
| TNF alpha       | TCAGCCTCTTCTCATTCTG    | TGAAGAGAACCTGGGAGTAG     |
| <b>Human</b>    |                        |                          |
| Hpa2            | CAGGGCATTGATGTCGTGATAC | GCCAGTAGTCTGGTAATGGGTTA  |
| Actin           | CGCCCCAGGCACCAGGGC     | GCTGGGGTGTGGAAGGT        |
| HSF1            | ATAGCCCCAGTAGGACAAACG  | TGTGAAGCCCCAACCAAAC      |
| HSP-27          | GGACGAGCATGGCTACATCT   | GACTGGGATGGTGATCTCGT     |
| HSP-40          | AAGAAGCAAGATCCCCCAGT   | GCTGGAATGTTGTTGGAGGT     |
| HSP-70          | AGCCAAGAAGGCAAAAGTGA   | CCACTGCGTTCTTAGCATCA     |
| HSPA1A          | CGACCTGAACAAGAGCATCA   | AAGATCTGCGTCTGCTTGGT     |
| HSPA1B          | CGACCTGAACAAGAGCATCA   | AAGATCTGCGTCTGCTTGGT     |
| HSP105 $\alpha$ | ACCACCAGAAAACCCAGACA   | TTTGCTTTGTCAGCATCTGG     |
| HSP105 $\beta$  | TCCGGAAAGATGAACAGGTC   | TGCACATCCTCTGGCTACTG     |
